# Supplementary material for: Establishing an optimized method for the separation of low and high abundance blood plasma proteins
Source: PeerJ journal article supplement (doi:10.7717/peerj-achem.6), 2020-02-10
Supplement: achem-42746-SUPPLEMENTARY_5_Figure_3_and_4__as_well_as_table_1_QC_data.xlsx [file achem-42746-SUPPLEMENTARY_5_Figure_3_and_4__as_well_as_table_1_QC_data.xlsx]

## Sheet: Figure 3
Figure 3
	eluted	bound
eluted 1	28.76	71.24
eluted 2	29.88	70.12
eluted 3	34.12	65.88
eluted 4	34.32	65.68
eluted 5	32.8	67.2
eluted 6	37.02	62.98
eluted 7	29.87	70.13
eluted 8	26.27	73.73
eluted 9	20.52	79.48
eluted 10	24.04	75.96
eluted 11	23.16	76.84
eluted 12	24.13	75.87
eluted 13	27.83	72.17
eluted 14	30.93	69.07
eluted 15	27.37	72.63	28.7347	average of 1-15
eluted 16	53.22	46.78
eluted 17	39.71	60.29
eluted 18	43.91	56.09
eluted 19	37.75	62.25
eluted 20	40.61	59.39
eluted 21	42.53	57.47
eluted 22	45.86	54.14	41.7283	average of 17-22
eluted 23	52.62	47.38
eluted 24	45.49	54.51
eluted 25	55.94	44.06
eluted 26	55.97	44.03
eluted 27	56.61	43.39	53.326	average of 23-27
everage	37.083	62.917
SD	11.0731	11.0731
cv	29.8604	17.5995
Raw data and calculations

## Sheet: Table 1 
	Eluted		Bound
protein (mg)	beforconcentration		beforconcentration
	860.3		597.6
	954.4		623.39
	981.6		651.58
	1057.6		652.09
	1014.7		703.05
	935.1		782.86
everage	967.283		668.428
SD	68.202		66.1652
cv	7.05089		9.89863
	Eluted		Bound
protein (mg)	Affter concentration		After concentration
	690.22		472.54
	738.46		585.77
	777.94		518.93
	756.7		559.66
	726.81
	806.02
everage	749.358		534.225
SD	40.5115		49.4732
cv	5.40616		9.26075

## Sheet: Figue 4 
Figure 4
	25% glycerol	25% glycerol			25% glycerol			10% glycerol	10% glycerol			10% glycerol
time (min)		0.25			average							average			T-test
0	1630	1620			1625			1626	1630			1628			0.742238
10	615	610			612.5			420	430			425			0.0254512
15	470	474			472			305	306			305.5			0.00573516
20	360	365			362.5			284	283			283.5			0.0241638
25	300	304			302			223	228			225.5			0.00416085
30	287	288			287.5			219	217			218			0.0137379
40	286	278			282			207	209			208			0.0429496
55	250	249			249.5			190	192			191			0.01632
70	210	209			209.5			180	181			180.5			0.0219437
85	205	203			204			179	180			179.5			0.0389281
100	200	199			199.5			140	141			140.5			0.0107891
115	200	198			199			120	121			120.5			0.0121632
125	195	194			194.5			115	116			115.5			0.00805805
